# Supplementary material for: Towards ferroelectricity-inducing chains of halogenoantimonates(iii) and halogenobismuthates(iii)
Source: Royal Society of Chemistry journal article supplement (doi:10.1039/d0ra10151f), 2021-01-01
Supplement: d0ra10151f1.pdf [file d0ra10151f1.pdf]

# Towards ferroelectricity-inducing chains of halogenoantimonates(III) and halogenobismuthates(III)

Magdalena Owczarek,<sup>1,\*</sup> Przemysław Szklarz, Ryszard Jakubas

*Faculty of Chemistry, University of Wrocław, F. Joliot Curie 14, 50-383 Wrocław, Poland.*

<sup>1</sup>*Current address: Materials Physics and Applications Division, Center for Integrated Nanotechnologies, Los Alamos National Laboratory, Los Alamos, New Mexico 87545, USA*

*magdalena@lanl.gov*

## SUPPORTING INFORMATION

### Table of Contents

|                                                                                    |    |
|------------------------------------------------------------------------------------|----|
| 1. TGA & DTA results.....                                                          | 2  |
| 2. Single-crystal X-ray diffraction .....                                          | 3  |
| a) 2-mercaptopyrimidinium family .....                                             | 3  |
| b) 2-aminopyrimidinium family .....                                                | 5  |
| c) 2-amino-4-methylpyrimidinium family .....                                       | 8  |
| 3. Dielectric spectroscopy .....                                                   | 11 |
| a) (2Sprm) <sub>2</sub> BiCl <sub>5</sub> .....                                    | 11 |
| b) (2Aprm) <sub>2</sub> SbCl <sub>5</sub> .....                                    | 11 |
| c) (2Aprm) <sub>4</sub> Bi <sub>2</sub> Cl <sub>10</sub> · 2H <sub>2</sub> O ..... | 12 |
| d) (2A4Mprm) <sub>4</sub> Bi <sub>2</sub> Br <sub>10</sub> .....                   | 12 |
| 4. References.....                                                                 | 13 |

## 1. TGA & DTA results

### ❖ 2-mercaptopyrimidinium family

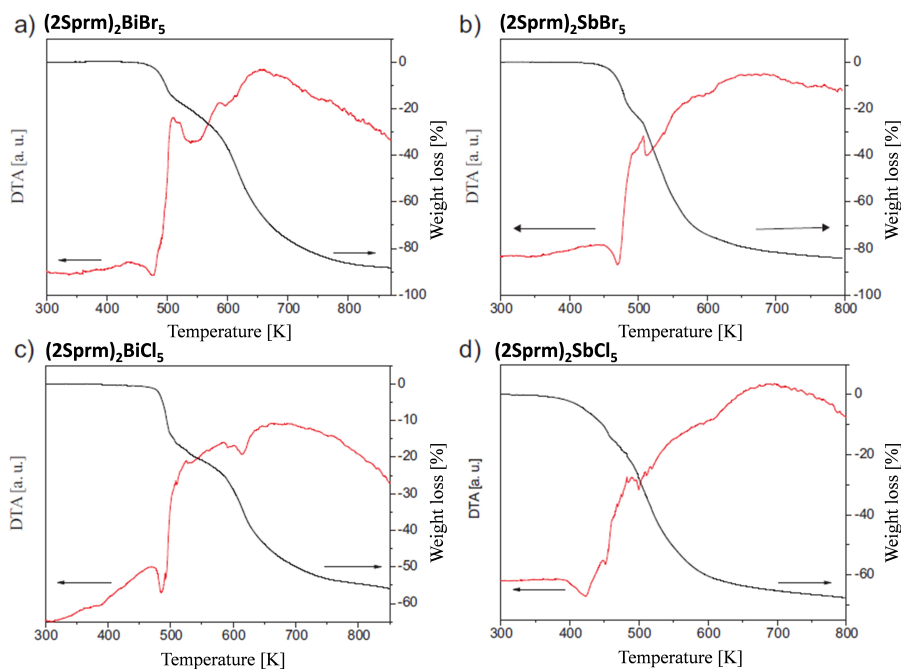

**Figure S1.** Thermogravimetric (TGA) and differential thermal (DTA) analyses scans obtained for a)  $(2\text{Sprm})_2\text{BiBr}_5$  /  $m = 13.894$  mg; b)  $(2\text{Sprm})_2\text{SbBr}_5$  /  $m = 9.026$  mg; c)  $(2\text{Sprm})_2\text{BiCl}_5$  /  $m = 12.682$  mg; d)  $(2\text{Sprm})_2\text{SbCl}_5$  /  $m = 7.310$  mg.

### ❖ 2-aminopyrimidinium family

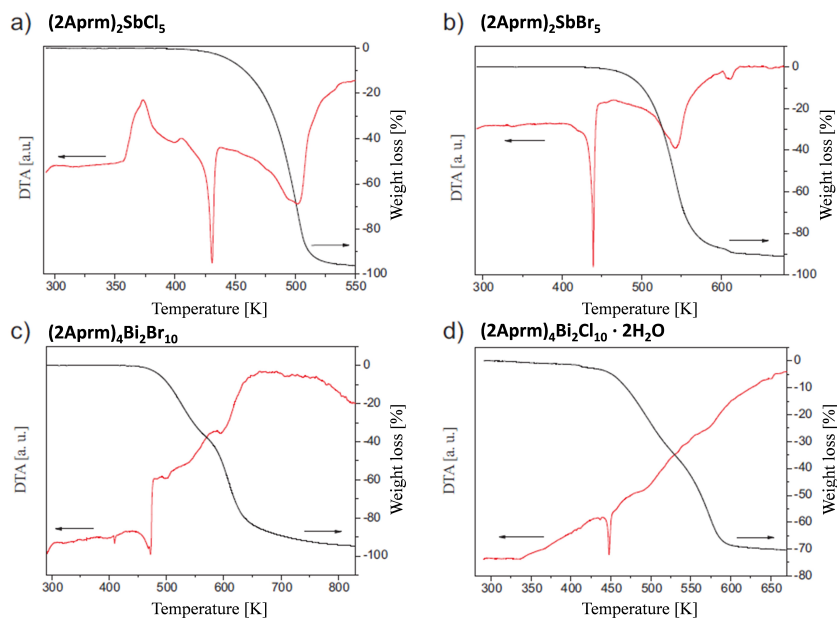

**Figure S2.** Thermogravimetric (TGA) and differential thermal (DTA) analyses scans obtained for a)  $(2\text{Aprm})_2\text{SbCl}_5$  /  $m = 8.420$  mg; b)  $(2\text{Aprm})_2\text{SbBr}_5$  /  $m = 14.024$  mg; c)  $(2\text{Aprm})_4\text{Bi}_2\text{Br}_{10}$  /  $m = 9.788$  mg; d)  $(2\text{Aprm})_4\text{Bi}_2\text{Cl}_{10} \cdot \text{H}_2\text{O}$  /  $m = 7.158$  mg.

❖ 2-amino-4-methylpyrimidinium family

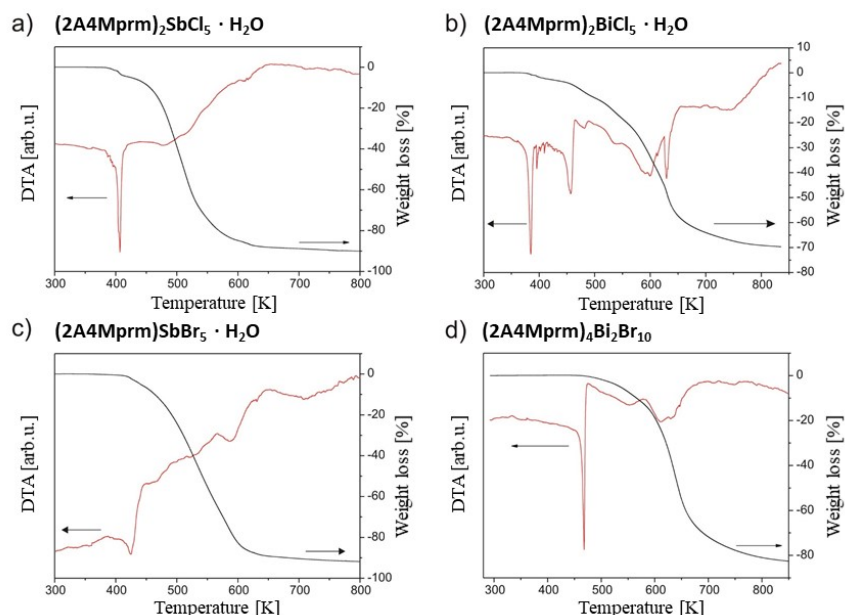

**Figure S3.** Thermogravimetric (TGA) and differential thermal (DTA) analyses scans obtained for a)  $(2A4Mprm)_2SbCl_5 \cdot H_2O$  /  $m = 7.238$  mg; b)  $(2A4Mprm)_2BiCl_5 \cdot H_2O$  /  $m = 12.160$  mg; c)  $(2A4Mprm)SbBr_5 \cdot H_2O$  /  $m = 8.982$  mg; d)  $(2A4Mprm)_4Bi_2Br_{10}$  /  $m = 13.834$  mg.

## 2. Single-crystal X-ray diffraction

### a) 2-mercaptopyrimidinium family

The X-ray diffraction data of the **2Sprm** crystals were collected at 100K using Oxford Diffraction Xcalibur diffractometer with Onyx CCD detector and Mo  $K\alpha$  radiation. Data collection and reduction were carried out with CrysAlis CCD and CrysAlis PRO, respectively. Using Olex<sup>2,1</sup> crystal structures were solved by the Patterson method (SHELXS<sup>2</sup> program and refined with the ShelXL<sup>2</sup> with anisotropic thermal parameters for non-H atoms. The H atoms of the aromatic CH and NH groups were refined by means of a riding model with fixed C–H and N–H distances equal to 0.95 and 0.88 Å and  $U_{iso}(H) = 1.2U_{eq}(C \text{ or } N)$ . Crystallographic data for the structure reported have been deposited with the Cambridge Crystallographic Data Centre, CCDC Nos. 2023489–2023491. Copies of this information may be obtained free of charge via [www.ccdc.cam.ac.uk/data\\_request/cif](http://www.ccdc.cam.ac.uk/data_request/cif) website.

**Table S1.** Crystal data, data collection and structure refinement parameters for **2Sprm** crystals.

|                                       | $(2Sprm)_2SbCl_5$       | $(2Sprm)_2BiCl_5$       | $(2Sprm)_2BiBr_5$       |
|---------------------------------------|-------------------------|-------------------------|-------------------------|
| Empirical formula                     | $C_8H_{10}N_4S_2SbCl_5$ | $C_8H_{10}N_4S_2BiCl_5$ | $C_8H_{10}N_4S_2BiBr_5$ |
| Formula weight / $g \text{ mol}^{-1}$ | 525.32                  | 612.55                  | 834.85                  |
| Temperature / K                       | 100(2)                  | 100(2)                  | 100(2)                  |

|                                                                       |                                                                    |                                                                    |                                                                    |
|-----------------------------------------------------------------------|--------------------------------------------------------------------|--------------------------------------------------------------------|--------------------------------------------------------------------|
| Wavelength / Å                                                        | 0.71073                                                            | 0.71073                                                            | 0.71073                                                            |
| Crystal system                                                        | Monoclinic                                                         | Monoclinic                                                         | Monoclinic                                                         |
| Space group                                                           | $P2_1/n$                                                           | $P2_1/n$                                                           | $P2_1/n$                                                           |
| $a$ / Å                                                               | 5.540(4)                                                           | 5.000(4)                                                           | 5.752(4)                                                           |
| $b$ / Å                                                               | 14.910(5)                                                          | 15.082(5)                                                          | 15.263(5)                                                          |
| $c$ / Å                                                               | 10.210(5)                                                          | 10.360(4)                                                          | 10.633(4)                                                          |
| $\alpha$                                                              | 90.00                                                              | 90.00                                                              | 90.00                                                              |
| $\beta$                                                               | 104.08(2)                                                          | 104.39(2)                                                          | 104.77(2)                                                          |
| $\gamma$                                                              | 90.00                                                              | 90.00                                                              | 90.00                                                              |
| $V$ / Å <sup>3</sup>                                                  | 818.0(8)                                                           | 832.4(7)                                                           | 902.7(8)                                                           |
| $Z$                                                                   | 2                                                                  | 2                                                                  | 2                                                                  |
| $D_{\text{calc}}$ / Mg m <sup>-3</sup>                                | 2.133                                                              | 2.444                                                              | 3.072                                                              |
| $\mu$ / mm <sup>-1</sup>                                              | 2.751                                                              | 11.636                                                             | 21.058                                                             |
| $F(000)$                                                              | 508                                                                | 572                                                                | 752                                                                |
| Crystal size / mm <sup>3</sup>                                        | 0.26 × 0.13 × 0.07                                                 | 0.20 × 0.16 × 0.13                                                 | 0.13 × 0.12 × 0.12                                                 |
| $\theta$ range / °                                                    | 4.9–33.7                                                           | 4.7–38.5                                                           | 4.8–28.7                                                           |
| Ranges of $h, k, l$                                                   | $-7 \leq h \leq 22$<br>$-22 \leq k \leq 22$<br>$-9 \leq l \leq 13$ | $-8 \leq h \leq 9$<br>$-26 \leq k \leq 17$<br>$-16 \leq l \leq 17$ | $-7 \leq h \leq 7$<br>$-20 \leq k \leq 11$<br>$-14 \leq l \leq 13$ |
| Absorption correction                                                 | analytical                                                         | analytical                                                         | analytical                                                         |
| Reflections collected/unique                                          | 5036/2715                                                          | 16766/4549                                                         | 5070/2247                                                          |
| $R_{\text{int}}$                                                      | 0.0304                                                             | 0.0252                                                             | 0.0338                                                             |
| Data/restraints/parameters                                            | 2715/2/97                                                          | 4549/2/96                                                          | 2247/2/94                                                          |
| Goodness-of-fit on $F^2$                                              | 1.05                                                               | 1.02                                                               | 1.03                                                               |
| Final $R$ indices [ $I > 2\sigma(I)$ ]                                | $R_1 = 0.0293$<br>$wR_2 = 0.0505$                                  | $R_1 = 0.0189$<br>$wR_2 = 0.0348$                                  | $R_1 = 0.0266$<br>$wR_2 = 0.0536$                                  |
| $R$ indices (all data)                                                | $R_1 = 0.0420$<br>$wR_2 = 0.0561$                                  | $R_1 = 0.0286$<br>$wR_2 = 0.0373$                                  | $R_1 = 0.0355$<br>$wR_2 = 0.0566$                                  |
| $\Delta\rho_{\text{max}}/\Delta\rho_{\text{min}}$ / e Å <sup>-3</sup> | 0.72/–0.81                                                         | 1.48/–1.45                                                         | 1.92/–1.56                                                         |
| CCDC number                                                           | 2023489                                                            | 2023490                                                            | 2023491                                                            |

**Table S2.** Geometric parameters of anionic units of **2Sprm** crystals.

| <b>(2Sprm)<sub>2</sub>SbCl<sub>5</sub></b>                             |              |                                       |             |                                       |             |
|------------------------------------------------------------------------|--------------|---------------------------------------|-------------|---------------------------------------|-------------|
| Sb—Cl3 <sup>1</sup>                                                    | 2.6165(10) Å | Cl2—Sb—Cl3 <sup>1</sup>               | 90.17(3)°   | Cl1—Sb—Cl2                            | 91.67(4)°   |
| Sb—Cl3                                                                 | 2.6164(10) Å | Cl2 <sup>1</sup> —Sb—Cl3 <sup>1</sup> | 89.83(3)°   | Cl1 <sup>1</sup> —Sb—Cl2              | 88.33(4)°   |
| Sb—Cl2 <sup>1</sup>                                                    | 2.5808(13) Å | Cl2 <sup>1</sup> —Sb—Cl3              | 90.17(3)°   | Cl1 <sup>1</sup> —Sb—Cl2 <sup>1</sup> | 91.67(4)°   |
| Sb—Cl2                                                                 | 2.5808(13) Å | Cl2—Sb—Cl2 <sup>1</sup>               | 180.0°      | Cl1—Sb—Cl2 <sup>1</sup>               | 88.33(4)°   |
| Sb—Cl1 <sup>1</sup>                                                    | 2.306(2) Å   | Cl1 <sup>1</sup> —Sb—Cl3              | 88.51(3)°   | Cl1—Sb—Cl1 <sup>1</sup>               | 180.00(6)°  |
| Sb—Cl1                                                                 | 2.306(2) Å   | Cl1 <sup>1</sup> —Sb—Cl3 <sup>1</sup> | 91.49(3)°   | Cl1 <sup>2</sup> —Cl1—Sb              | 152.56(18)° |
| Cl3—Sb—Cl3 <sup>1</sup>                                                | 180.0°       | Cl1—Sb—Cl3                            | 91.49(3)°   |                                       |             |
| Cl2—Sb—Cl3                                                             | 89.83(3)°    | Cl1—Sb—Cl3 <sup>1</sup>               | 88.51(3)°   |                                       |             |
| Symmetry code: 1: $-x+1, -y+1, -z+1$ ; 2: $-x, -y+1, -z+1$             |              |                                       |             |                                       |             |
| <b>(2Sprm)<sub>2</sub>BiCl<sub>5</sub></b>                             |              |                                       |             |                                       |             |
| Bi—Cl3 <sup>1</sup>                                                    | 2.6859(9) Å  | Cl3—Bi—Cl1 <sup>2</sup>               | 90.717(11)° | Cl2 <sup>1</sup> —Bi—Cl1 <sup>2</sup> | 86.94(3)°   |
| Bi—Cl3                                                                 | 2.6859(9) Å  | Cl3—Bi—Cl1                            | 89.829(11)° | Cl2—Bi—Cl1                            | 86.94(3)°   |
| Bi—Cl2 <sup>1</sup>                                                    | 2.6537(10) Å | Cl2—Bi—Cl3 <sup>1</sup>               | 89.93(2)°   | Cl2 <sup>1</sup> —Bi—Cl1              | 93.06(3)°   |
| Bi—Cl2                                                                 | 2.6538(10) Å | Cl2 <sup>1</sup> —Bi—Cl3 <sup>1</sup> | 90.07(2)°   | Cl2—Bi—Cl1 <sup>2</sup>               | 93.06(3)°   |
| Bi—Cl1 <sup>1</sup>                                                    | 2.750(2) Å   | Cl2—Bi—Cl3                            | 90.07(2)°   | Cl1 <sup>2</sup> —Bi—Cl1              | 180.0°      |
| Bi—Cl1                                                                 | 2.750(2) Å   | Cl2 <sup>1</sup> —Bi—Cl3              | 89.93(2)°   | Bi <sup>3</sup> —Cl1—Bi               | 180.0°      |
| Cl3—Bi—Cl3 <sup>1</sup>                                                | 180.0°       | Cl2 <sup>1</sup> —Bi—Cl2              | 180.0°      |                                       |             |
| Symmetry code: 1: $-x+2, -y+1, -z+1$ ; 2: $x+1, y, z$ ; 3: $x-1, y, z$ |              |                                       |             |                                       |             |

| <b>(2Sprm)<sub>2</sub>BiBr<sub>5</sub></b>                     |              |                                       |           |                                       |             |
|----------------------------------------------------------------|--------------|---------------------------------------|-----------|---------------------------------------|-------------|
| Bi—Br2 <sup>1</sup>                                            | 2.8004(11) Å | Br2 <sup>1</sup> —Bi—Br3 <sup>1</sup> | 90.22(2)° | Br3—Bi—Br1                            | 89.488(12)° |
| Bi—Br2                                                         | 2.8004(11) Å | Br2—Bi—Br3                            | 90.22(2)° | Br3 <sup>1</sup> —Bi—Br1              | 90.511(12)° |
| Bi—Br3                                                         | 2.8219(9) Å  | Br2 <sup>1</sup> —Bi—Br3              | 89.78(2)° | Br3—Bi—Br1 <sup>2</sup>               | 90.512(12)° |
| Bi—Br3 <sup>1</sup>                                            | 2.8219(9) Å  | Br2 <sup>1</sup> —Bi—Br1 <sup>2</sup> | 86.24(3)° | Br3 <sup>1</sup> —Bi—Br1 <sup>2</sup> | 89.489(12)° |
| Bi—Br1 <sup>2</sup>                                            | 2.876(2) Å   | Br2—Bi—Br1                            | 86.24(3)° | Br1 <sup>2</sup> —Bi—Br1              | 180.0°      |
| Bi—Br1                                                         | 2.876(2) Å   | Br2—Bi—Br1 <sup>2</sup>               | 93.76(3)° | Bi <sup>3</sup> —Br1—Bi               | 180.0°      |
| Br2 <sup>1</sup> —Bi—Br2                                       | 180.0°       | Br2 <sup>1</sup> —Bi—Br1              | 93.76(3)° |                                       |             |
| Br2—Bi—Br3 <sup>1</sup>                                        | 89.78(2)°    | Br3—Bi—Br3 <sup>1</sup>               | 180.0°    |                                       |             |
| Symmetry code: 1: -x+3, -y+1, -z+1; 2: x+1, y, z; 3: x-1, y, z |              |                                       |           |                                       |             |

**Table S3.** Hydrogen bonds parameters (Å, °) of **2Sprm** crystals.

| <i>D</i> —H··· <i>A</i>                                       | <i>D</i> —H [Å] | <i>H</i> ··· <i>A</i> [Å] | <i>D</i> ··· <i>A</i> [Å] | <i>D</i> —H··· <i>A</i> [°] |
|---------------------------------------------------------------|-----------------|---------------------------|---------------------------|-----------------------------|
| <b>(2Sprm)<sub>2</sub>SbCl<sub>5</sub></b>                    |                 |                           |                           |                             |
| N1—H1···S <sup>1</sup>                                        | 0.86            | 2.43                      | 3.274(2)                  | 169                         |
| N3—H3···Cl3 <sup>2</sup>                                      | 0.89            | 2.32                      | 3.225(3)                  | 168                         |
| Symmetry codes: 1: -x+1, -y+1, -z+2; 2: -x+3/2, y-1/2, -z+3/2 |                 |                           |                           |                             |
| <b>(2Sprm)<sub>2</sub>BiCl<sub>5</sub></b>                    |                 |                           |                           |                             |
| N1—H1···S <sup>1</sup>                                        | 0.87            | 2.44                      | 3.2852(17)                | 164                         |
| N3—H3···Cl3 <sup>2</sup>                                      | 0.85            | 2.36                      | 3.203(2)                  | 168                         |
| Symmetry codes: 1: -x+1, -y+1/2, -z; 2: -x+2, y+1/2, -z       |                 |                           |                           |                             |
| <b>(2Sprm)<sub>2</sub>BiBr<sub>5</sub></b>                    |                 |                           |                           |                             |
| N1—H1···S <sup>1</sup>                                        | 0.88(2)         | 2.46                      | 3.292(4)                  | 157                         |
| N3—H3···Br3 <sup>2</sup>                                      | 0.87(2)         | 2.51                      | 3.368(5)                  | 168                         |
| Symmetry codes: 1: -x+1, -y+1, -z; 2: x-3/2, -y+1/2, z-1/2    |                 |                           |                           |                             |

## b) 2-aminopyrimidinium family

The X-ray diffraction data of the **2Aprm** crystals were collected at 100K or 120K [(**2Aprm**)<sub>4</sub>Bi<sub>2</sub>Cl<sub>10</sub> · 2H<sub>2</sub>O] using Oxford Diffraction Xcalibur diffractometer with Onyx or Sapphire2 CCD detectors and Mo K $\alpha$  radiation. Data collection and reduction were carried out with CrysAlis CCD and CrysAlis PRO, respectively. Using Olex2<sup>[1]</sup>, crystal structures were solved by Patterson or direct methods [(**2Aprm**)<sub>4</sub>Bi<sub>2</sub>Br<sub>10</sub>] (SHELXS program<sup>[2]</sup> and refined with the ShelXL<sup>[2]</sup> with anisotropic thermal parameters for non-H atoms. The H atoms of the aromatic groups—CH, NH—and NH<sub>2</sub> group were refined by means of a riding model with fixed C—H and N—H distances equal to 0.95 and 0.88 Å and  $U_{iso}(H) = 1.2U_{eq}(C \text{ or } N)$ . Water H atoms in (**2Aprm**)<sub>4</sub>Bi<sub>2</sub>Br<sub>10</sub> · H<sub>2</sub>O were refined with a rigid model with O—H and H···H distances equal to 0.88 Å and 1.44 Å, respectively, and  $U_{iso}(H) = 1.5U_{eq}(O)$ . Crystallographic data for the structure reported have been deposited with the Cambridge Crystallographic Data Centre, CCDC Nos. 2025386–2025389. Copies of this information may be obtained free of charge via [www.ccdc.cam.ac.uk/data\\_request/cif](http://www.ccdc.cam.ac.uk/data_request/cif) website.

**Table S4.** Crystal data, data collection and structure refinement parameters for **2Aprm** crystals.

|                                                           | <b>(2Aprm)<sub>2</sub>SbCl<sub>5</sub></b>                        | <b>(2Aprm)<sub>2</sub>SbBr<sub>5</sub></b>                        | <b>(2Aprm)<sub>4</sub>Bi<sub>2</sub>Cl<sub>10</sub> · 2H<sub>2</sub>O</b>                       | <b>(2Aprm)<sub>2</sub>Bi<sub>2</sub>Br<sub>10</sub></b>           |
|-----------------------------------------------------------|-------------------------------------------------------------------|-------------------------------------------------------------------|-------------------------------------------------------------------------------------------------|-------------------------------------------------------------------|
| Empirical formula                                         | C <sub>8</sub> H <sub>12</sub> N <sub>6</sub> SbCl <sub>5</sub>   | C <sub>8</sub> H <sub>12</sub> N <sub>6</sub> SbBr <sub>5</sub>   | C <sub>16</sub> H <sub>28</sub> N <sub>12</sub> O <sub>2</sub> Bi <sub>2</sub> Cl <sub>10</sub> | C <sub>8</sub> H <sub>12</sub> N <sub>6</sub> BiBr <sub>5</sub>   |
| Formula weight / g mol <sup>-1</sup>                      | 491.06                                                            | 713.54                                                            | 1192.96                                                                                         | 800.77                                                            |
| Temperature / K                                           | 100(2)                                                            | 100(2)                                                            | 120(2)                                                                                          | 100(2)                                                            |
| Wavelength / Å                                            | 0.71073                                                           | 0.71073                                                           | 0.71073                                                                                         | 0.71073                                                           |
| Crystal system                                            | Monoclinic                                                        | Monoclinic                                                        | Monoclinic                                                                                      | Triclinic                                                         |
| Space group                                               | <i>P</i> 2 <sub>1</sub>                                           | <i>P</i> 2 <sub>1</sub>                                           | <i>C</i> 2/ <i>c</i>                                                                            | <i>P</i> $\bar{1}$                                                |
| <i>a</i> / Å                                              | 5.713(3)                                                          | 5.946(3)                                                          | 19.226(4)                                                                                       | 7.873(3)                                                          |
| <i>b</i> / Å                                              | 14.125(5)                                                         | 14.401(4)                                                         | 13.018(4)                                                                                       | 11.404(4)                                                         |
| <i>c</i> / Å                                              | 10.254(4)                                                         | 10.621(4)                                                         | 14.193(4)                                                                                       | 11.618(4)                                                         |
| <i>a</i>                                                  | 90.00                                                             | 90.00                                                             | 90.00                                                                                           | 115.80(5)                                                         |
| $\beta$                                                   | 105.65(2)                                                         | 105.31(2)                                                         | 100.74(2)                                                                                       | 96.30(4)                                                          |
| $\gamma$                                                  | 90.00                                                             | 90.00                                                             | 90.00                                                                                           | 98.86(4)                                                          |
| <i>V</i> / Å <sup>3</sup>                                 | 796.8(6)                                                          | 877.2(6)                                                          | 3490.1(16)                                                                                      | 909.4(7)                                                          |
| <i>Z</i>                                                  | 2                                                                 | 2                                                                 | 4                                                                                               | 2                                                                 |
| <i>D</i> <sub>calc</sub> / Mg m <sup>-3</sup>             | 2.047                                                             | 2.701                                                             | 2.270                                                                                           | 2.924                                                             |
| $\mu$ / mm <sup>-1</sup>                                  | 2.566                                                             | 12.959                                                            | 10.875                                                                                          | 20.676                                                            |
| <i>F</i> (000)                                            | 476                                                               | 656                                                               | 2240                                                                                            | 720                                                               |
| Crystal size / mm <sup>3</sup>                            | 0.22 × 0.18 × 0.12                                                | 0.16 × 0.15 × 0.10                                                | 0.17 × 0.08 × 0.06                                                                              | 0.31 × 0.13 × 0.04                                                |
| $\theta$ range / °                                        | 2.9–28.3                                                          | 4.7–28.7                                                          | 4.7–33.1                                                                                        | 3.0–36.7                                                          |
| Ranges of <i>h, k, l</i>                                  | -7 ≤ <i>h</i> ≤ 7<br>-18 ≤ <i>k</i> ≤ 18<br>-13 ≤ <i>l</i> ≤ 13   | -8 ≤ <i>h</i> ≤ 8<br>-15 ≤ <i>k</i> ≤ 19<br>-14 ≤ <i>l</i> ≤ 13   | -29 ≤ <i>h</i> ≤ 14<br>-16 ≤ <i>k</i> ≤ 19<br>-21 ≤ <i>l</i> ≤ 21                               | -8 ≤ <i>h</i> ≤ 11<br>-14 ≤ <i>k</i> ≤ 14<br>-19 ≤ <i>l</i> ≤ 14  |
| Absorption correction                                     | analytical                                                        | analytical                                                        | analytical                                                                                      | analytical                                                        |
| Reflections collected/unique                              | 11515/3899                                                        | 7214/3618                                                         | 13638/6456                                                                                      | 9692/5132                                                         |
| <i>R</i> <sub>int</sub>                                   | 0.0205                                                            | 0.0218                                                            | 0.0344                                                                                          | 0.048                                                             |
| Data/restraints/parameters                                | 3899/1/182                                                        | 3618/1/181                                                        | 6456/3/196                                                                                      | 5132/0/181                                                        |
| Goodness-of-fit on <i>F</i> <sup>2</sup>                  | 1.09                                                              | 1.10                                                              | 0.97                                                                                            | 1.04                                                              |
| Final <i>R</i> indices [ <i>I</i> > 2σ( <i>I</i> )]       | <i>R</i> <sub>1</sub> = 0.0184<br><i>wR</i> <sub>2</sub> = 0.0445 | <i>R</i> <sub>1</sub> = 0.0226<br><i>wR</i> <sub>2</sub> = 0.0487 | <i>R</i> <sub>1</sub> = 0.0301<br><i>wR</i> <sub>2</sub> = 0.0414                               | <i>R</i> <sub>1</sub> = 0.0546<br><i>wR</i> <sub>2</sub> = 0.1377 |
| <i>R</i> indices (all data)                               | <i>R</i> <sub>1</sub> = 0.0188<br><i>wR</i> <sub>2</sub> = 0.0447 | <i>R</i> <sub>1</sub> = 0.0250<br><i>wR</i> <sub>2</sub> = 0.0498 | <i>R</i> <sub>1</sub> = 0.0498<br><i>wR</i> <sub>2</sub> = 0.0463                               | <i>R</i> <sub>1</sub> = 0.0648<br><i>wR</i> <sub>2</sub> = 0.1499 |
| $\Delta\rho_{\max}/\Delta\rho_{\min}$ / e Å <sup>-3</sup> | 0.80/-0.30                                                        | 1.06/-0.52                                                        | 1.66/-1.05                                                                                      | 2.72/-2.76                                                        |
| Flack parameter                                           | 0.397(14)                                                         | 0.446(13)                                                         | -                                                                                               | -                                                                 |
| CCDC number                                               | 2025386                                                           | 2025387                                                           | 2025388                                                                                         | 2025389                                                           |

**Table S5.** Geometric parameters of anionic units of **2Aprm** crystals.

| <b>(2Aprm)<sub>2</sub>SbCl<sub>5</sub></b> |              |            |            |            |           |
|--------------------------------------------|--------------|------------|------------|------------|-----------|
| Sb—Cl4                                     | 2.6536(12) Å | Cl3—Sb—Cl4 | 89.88(3)°  | Cl5—Sb—Cl4 | 91.32(3)° |
| Sb—Cl3                                     | 2.5834(12) Å | Cl3—Sb—Cl2 | 87.80(3)°  | Cl1—Sb—Cl1 | 86.47(3)° |
| Sb—Cl2                                     | 2.6119(12) Å | Cl3—Sb—Cl5 | 174.07(3)° | Cl1—Sb—Cl3 | 89.19(3)° |
| Sb—Cl5                                     | 2.6315(12) Å | Cl2—Sb—Cl4 | 174.97(3)  | Cl1—Sb—Cl2 | 89.04(3)° |
| Sb—Cl1                                     | 2.3905(14) Å | Cl2—Sb—Cl5 | 90.54(3)°  | Cl1—Sb—Cl5 | 85.08(3)° |
| <b>(2Aprm)<sub>2</sub>SbBr<sub>5</sub></b> |              |            |            |            |           |
| Sb—Br2                                     | 2.7662(14) Å | Br2—Sb—Br3 | 90.19(3)°  | Br5—Sb—Br4 | 89.61(3)° |
| Sb—Br3                                     | 2.7796(13) Å | Br2—Sb—Br4 | 178.70(3)° | Br1—Sb—Br2 | 90.46(3)° |
| Sb—Br5                                     | 2.7599(13) Å | Br3—Sb—Br4 | 90.84(4)°  | Br1—Sb—Br3 | 87.29(3)° |
| Sb—Br4                                     | 2.8021(14) Å | Br5—Sb—Br2 | 89.32(4)°  | Br1—Sb—Br5 | 90.86(3)° |

|                                                                           |              |                         |            |                          |            |
|---------------------------------------------------------------------------|--------------|-------------------------|------------|--------------------------|------------|
| Sb—Br1                                                                    | 2.5594(15) Å | Br5—Sb—Br3              | 178.09(3)° | Br1—Sb—Br4               | 88.81(3)°  |
| <b>(2Aprm)<sub>4</sub>Bi<sub>2</sub>Cl<sub>10</sub> · 2H<sub>2</sub>O</b> |              |                         |            |                          |            |
| Bi—Cl4                                                                    | 2.6096(11) Å | Cl4—Bi—Cl5 <sup>1</sup> | 91.76(3)°  | Cl1—Bi—Cl5               | 92.70(3)°  |
| Bi—Cl3                                                                    | 2.5171(9) Å  | Cl4—Bi—Cl2              | 175.36(3)° | Cl1—Bi—Cl2               | 90.31(3)°  |
| Bi—Cl1                                                                    | 2.6733(11) Å | Cl3—Bi—Cl4              | 88.64(3)°  | Cl5 <sup>1</sup> —Bi—Cl5 | 82.00(3)°  |
| Bi—Cl5 <sup>1</sup>                                                       | 2.7800(12) Å | Cl3—Bi—Cl1              | 94.03(3)°  | Cl5 <sup>1</sup> —Bi—Cl2 | 89.15(3)°  |
| Bi—Cl5                                                                    | 3.0260(10) Å | Cl3—Bi—Cl5              | 173.25(3)° | Cl2—Bi—Cl5               | 92.73(3)°  |
| Bi—Cl2                                                                    | 2.7847(12) Å | Cl3—Bi—Cl5 <sup>1</sup> | 91.26(3)°  | Bi <sup>1</sup> —Cl5—Bi  | 98.00(3)°  |
| Cl4—Bi—Cl1                                                                | 89.21(3)°    | Cl3—Bi—Cl2              | 86.79(3)°  |                          |            |
| Cl4—Bi—Cl5                                                                | 91.90(3)°    | Cl1—Bi—Cl5 <sup>1</sup> | 174.62(2)° |                          |            |
| Symmetry code: 1: $-x+1/2, -y+1/2, -z+1$                                  |              |                         |            |                          |            |
| <b>(2Aprm)<sub>4</sub>Bi<sub>2</sub>Br<sub>10</sub></b>                   |              |                         |            |                          |            |
| Bi—Br5                                                                    | 2.8247(16) Å | Br5—Bi—Br4              | 91.52(4)°  | Br1—Bi—Br2               | 90.44(5)°  |
| Bi—Br3                                                                    | 2.9362(17) Å | Br3—Bi—Br3 <sup>1</sup> | 85.68(5)°  | Br2—Bi—Br5               | 87.25(4)°  |
| Bi—Br3 <sup>1</sup>                                                       | 3.090(3) Å   | Br3—Bi—Br4              | 88.58(4)°  | Br2—Bi—Br3               | 92.62(4)°  |
| Bi—Br4                                                                    | 2.9644(14) Å | Br4—Bi—Br3 <sup>1</sup> | 89.10(4)°  | Br2—Bi—Br3 <sup>1</sup>  | 90.43(5)°  |
| Bi—Br1                                                                    | 2.724(2) Å   | Br1—Bi—Br5              | 95.08(6)°  | Br2—Bi—Br4               | 178.67(3)° |
| Bi—Br2                                                                    | 2.7333(14) Å | Br1—Bi—Br3 <sup>1</sup> | 173.77(3)° | Bi—Br3—Bi <sup>1</sup>   | 94.32(5)°  |
| Br5—Bi—Br3                                                                | 176.79(3)°   | Br1—Bi—Br3              | 88.12(6)°  |                          |            |
| Br5—Bi—Br3 <sup>1</sup>                                                   | 91.12(5)°    | Br1—Bi—Br4              | 90.16(5)°  |                          |            |
| Symmetry code: 1: $-x+1, -y, -z+1$                                        |              |                         |            |                          |            |

**Table S6.** Hydrogen bonds parameters (Å, °) of **2Aprm** crystals.

| $D-H\cdots A$                                                             | $D-H$ [Å] | $H\cdots A$ [Å] | $D\cdots A$ [Å] | $D-H\cdots A$ [°] |
|---------------------------------------------------------------------------|-----------|-----------------|-----------------|-------------------|
| <b>(2Aprm)<sub>2</sub>SbCl<sub>5</sub></b>                                |           |                 |                 |                   |
| N2B—H2BA $\cdots$ N3A                                                     | 0.88      | 2.09            | 2.965(4)        | 172               |
| N2A—H2AB $\cdots$ N3B                                                     | 0.88      | 2.10            | 2.975(4)        | 172               |
| N2B—H2BB $\cdots$ Cl2 <sup>1</sup>                                        | 0.88      | 2.91            | 3.635(3)        | 141               |
| N1A—H1A $\cdots$ Cl4 <sup>2</sup>                                         | 0.88      | 2.30            | 3.154(3)        | 163               |
| N2A—H2AB $\cdots$ Cl4 <sup>2</sup>                                        | 0.88      | 2.75            | 3.496(3)        | 143               |
| N1B—H1B $\cdots$ Cl2 <sup>1</sup>                                         | 0.88      | 2.34            | 3.197(3)        | 164               |
| Symmetry codes: 1: $-x+1, -y+1/2, -z+1$ ; 2: $-x, y-1/2, -z+1$            |           |                 |                 |                   |
| <b>(2Aprm)<sub>2</sub>SbBr<sub>5</sub></b>                                |           |                 |                 |                   |
| N2B—H2BA $\cdots$ N3A                                                     | 0.88      | 2.10            | 2.975(9)        | 174               |
| N2A—H2AB $\cdots$ N3B                                                     | 0.88      | 2.10            | 2.981(9)        | 176               |
| N2B—H2BB $\cdots$ Br4 <sup>2</sup>                                        | 0.88      | 2.84            | 3.602(7)        | 147               |
| N1A—H1A $\cdots$ Br2 <sup>1</sup>                                         | 0.88      | 2.50            | 3.354(6)        | 164               |
| N2A—H2AA $\cdots$ Br2 <sup>1</sup>                                        | 0.88      | 2.96            | 3.705(7)        | 144               |
| N1B—H1B $\cdots$ Br4 <sup>2</sup>                                         | 0.88      | 2.46            | 3.317(3)        | 164               |
| Symmetry codes: 1: $-x+1, -y+1/2, -z$ ; 2: $-x+2, y+1/2, -z$              |           |                 |                 |                   |
| <b>(2Aprm)<sub>4</sub>Bi<sub>2</sub>Cl<sub>10</sub> · 2H<sub>2</sub>O</b> |           |                 |                 |                   |
| N1B—H1B $\cdots$ O1W <sup>1</sup>                                         | 0.88      | 1.79            | 2.663(4)        | 173               |
| N2B—H2BB $\cdots$ N3A                                                     | 0.88      | 2.05            | 2.934(4)        | 178               |
| N2A—H2AA $\cdots$ N3B                                                     | 0.88      | 2.24            | 3.114(4)        | 172               |
| N1A—H1A $\cdots$ Cl1                                                      | 0.88      | 2.37            | 3.199(3)        | 158               |
| N2B—H2BA $\cdots$ Cl2 <sup>1</sup>                                        | 0.88      | 2.42            | 3.245(3)        | 157               |
| N2A—H2AB $\cdots$ Cl1                                                     | 0.88      | 2.90            | 3.619(3)        | 140               |
| O1W—H1WA $\cdots$ Cl5 <sup>2</sup>                                        | 0.855(17) | 2.77(3)         | 3.480(3)        | 141(4)            |
| O1W—H1WA $\cdots$ Cl2                                                     | 0.866(18) | 2.57(2)         | 3.395(4)        | 159(4)            |
| Symmetry codes: 1: $-x, -y+1, -z+1$ ; 2: $x, -y+1, z-1/2$                 |           |                 |                 |                   |
| <b>(2Aprm)<sub>4</sub>Bi<sub>2</sub>Br<sub>10</sub></b>                   |           |                 |                 |                   |

|                                                                              |      |      |           |     |
|------------------------------------------------------------------------------|------|------|-----------|-----|
| N2A—H2AA···N3A <sup>2</sup>                                                  | 0.88 | 2.08 | 2.949(10) | 169 |
| N1A—H1A···Br5 <sup>1</sup>                                                   | 0.88 | 2.49 | 3.241(9)  | 144 |
| N2A—H2AB···Br3                                                               | 0.88 | 2.92 | 3.646(8)  | 141 |
| N2B—H2BA···Br3                                                               | 0.88 | 2.69 | 3.487(10) | 152 |
| N2B—H2BB···Br5 <sup>1</sup>                                                  | 0.88 | 2.60 | 3.440(11) | 161 |
| N1B—H1B···Br4 <sup>3</sup>                                                   | 0.88 | 2.48 | 3.291(9)  | 154 |
| Symmetry codes: 1: $x+1, y, z$ ; 2: $-x+2, -y+1, -z+1$ ; 3: $-x+1, -y, -z+1$ |      |      |           |     |

### c) 2-amino-4-methylpyrimidinium family

The X-ray diffraction data for **2A4Mprm** crystals were collected at 100K using Oxford Diffraction Xcalibur diffractometer with Onyx or Sapphire2 CCD detectors and Mo K $\alpha$  radiation. Data collection and reduction were carried out with CrysAlis CCD and CrysAlis PRO, respectively. Using Olex2<sup>[1]</sup>, crystal structures of **(2A4Mprm)<sub>2</sub>SbCl<sub>5</sub> · H<sub>2</sub>O**, **(2A4Mprm)<sub>2</sub>BiCl<sub>5</sub> · H<sub>2</sub>O**, and **(2A4Mprm)<sub>4</sub>Bi<sub>2</sub>Br<sub>10</sub>** were solved by Patterson method (SHELXS program<sup>[2]</sup>); crystal structure of **(2A4Mprm)SbBr<sub>5</sub> · H<sub>2</sub>O** was solved by direct methods (SHELXS program<sup>[2]</sup>). The structures were refined with the ShelXL<sup>[2]</sup> with anisotropic thermal parameters for non-H atoms. Water H atoms were refined with a rigid model with O–H and H···H distances equal to 0.88 Å and 1.44 Å, respectively, and  $U_{iso}(H) = 1.5U_{eq}(O)$ . The H atoms of the aromatic CH and NH groups, and NH<sub>2</sub> group on the second position of **2A4Mprm**, were refined by means of a riding model with fixed C–H and N–H distances equal to 0.95 and 0.88 Å and  $U_{iso}(H) = 1.2U_{eq}(C \text{ or } N)$ . The CH<sub>3</sub> groups were refined as rotating groups with a fixed C–H distance of 0.98 Å and  $U_{iso}(H) = 1.5U_{eq}(C)$ . Crystallographic data for the structure reported have been deposited with the Cambridge Crystallographic Data Centre, CCDC Nos. 2023492–2023495. Copies of this information may be obtained free of charge via [www.ccdc.cam.ac.uk/data\\_request/cif](http://www.ccdc.cam.ac.uk/data_request/cif) website.

**Table S7.** Crystal data, data collection and structure refinement parameters of **2A4Mprm** crystals.

|                                      | <b>(2A4Mprm)<sub>2</sub>SbCl<sub>5</sub> · H<sub>2</sub>O</b>     | <b>(2A4Mprm)<sub>2</sub>BiCl<sub>5</sub> · H<sub>2</sub>O</b>     | <b>(2A4Mprm)SbBr<sub>5</sub> · H<sub>2</sub>O</b>                | <b>(2A4Mprm)<sub>4</sub>Bi<sub>2</sub>Br<sub>10</sub></b>                        |
|--------------------------------------|-------------------------------------------------------------------|-------------------------------------------------------------------|------------------------------------------------------------------|----------------------------------------------------------------------------------|
| Empirical formula                    | C <sub>10</sub> H <sub>18</sub> N <sub>6</sub> OSbCl <sub>5</sub> | C <sub>10</sub> H <sub>18</sub> N <sub>6</sub> OBiCl <sub>5</sub> | C <sub>5</sub> H <sub>11</sub> N <sub>3</sub> OSbBr <sub>5</sub> | C <sub>20</sub> H <sub>32</sub> N <sub>12</sub> Bi <sub>2</sub> Br <sub>10</sub> |
| Formula weight / g mol <sup>-1</sup> | 537.30                                                            | 624.53                                                            | 650.47                                                           | 1657.63                                                                          |
| Temperature / K                      | 100(2)                                                            | 100(2)                                                            | 100(2)                                                           | 100(2)                                                                           |
| Wavelength / Å                       | 0.71073                                                           | 0.71073                                                           | 0.71073                                                          | 0.71073                                                                          |
| Crystal system                       | Monoclinic                                                        | Monoclinic                                                        | Monoclinic                                                       | Triclinic                                                                        |
| Space group                          | $P2_1/m$                                                          | $P2_1/m$                                                          | $P2_1/c$                                                         | $P\bar{1}$                                                                       |
| $a$ / Å                              | 5.626(3)                                                          | 5.586(3)                                                          | 11.296(4)                                                        | 9.775(4)                                                                         |
| $b$ / Å                              | 18.512(5)                                                         | 18.595(6)                                                         | 8.333(3)                                                         | 9.808(4)                                                                         |
| $c$ / Å                              | 8.957(4)                                                          | 8.970(4)                                                          | 16.662(4)                                                        | 11.435(5)                                                                        |
| $a$                                  | 90.00                                                             | 90.00                                                             | 90.00                                                            | 76.78(2)                                                                         |
| $\beta$                              | 91.09(2)                                                          | 90.66(2)                                                          | 108.10(2)                                                        | 65.46(2)                                                                         |
| $\gamma$                             | 90.00                                                             | 90.00                                                             | 90.00                                                            | 82.72(2)                                                                         |
| $V$ / Å <sup>3</sup>                 | 932.7(7)                                                          | 931.7(7)                                                          | 1490.8(8)                                                        | 970.2(7)                                                                         |
| $Z$                                  | 2                                                                 | 2                                                                 | 4                                                                | 1                                                                                |
| $D_{calc}$ / Mg m <sup>-3</sup>      | 1.913                                                             | 2.226                                                             | 2.898                                                            | 2.837                                                                            |
| $\mu$ / mm <sup>-1</sup>             | 2.206                                                             | 10.19                                                             | 15.234                                                           | 19.386                                                                           |



|                                                                               |                                                                    |                                                                    |                                                                     |                                                                      |
|-------------------------------------------------------------------------------|--------------------------------------------------------------------|--------------------------------------------------------------------|---------------------------------------------------------------------|----------------------------------------------------------------------|
| $F(000)$                                                                      | 528                                                                | 592                                                                | 1184                                                                | 752                                                                  |
| Crystal size / mm <sup>3</sup>                                                | 0.33 × 0.25 × 0.19                                                 | 0.38 × 0.24 × 0.15                                                 | 0.22 × 0.13 × 0.06                                                  | 0.19 × 0.16 × 0.12                                                   |
| $\theta$ range / °                                                            | 3.2–36.8                                                           | 3.2–28.7                                                           | 4.9–31.5                                                            | 2.9–27.1                                                             |
| Ranges of $h, k, l$                                                           | $-8 \leq h \leq 9$<br>$-30 \leq k \leq 30$<br>$-14 \leq l \leq 14$ | $-7 \leq h \leq 7$<br>$-23 \leq k \leq 25$<br>$-10 \leq l \leq 11$ | $-16 \leq h \leq 16$<br>$-9 \leq k \leq 12$<br>$-24 \leq l \leq 24$ | $-12 \leq h \leq 12$<br>$-12 \leq k \leq 12$<br>$-14 \leq l \leq 14$ |
| Absorption correction                                                         | analytical                                                         | analytical                                                         | analytical                                                          | analytical                                                           |
| Reflections collected/unique                                                  | 16596/4576                                                         | 6440/2332                                                          | 17564/4942                                                          | 9141/4262                                                            |
| $R_{\text{int}}$                                                              | 0.020                                                              | 0.030                                                              | 0.055                                                               | 0.020                                                                |
| Data/restraints/parameters                                                    | 4576/3/117                                                         | 2332/3/117                                                         | 4942/3/143                                                          | 4262/0/201                                                           |
| Goodness-of-fit on $F^2$                                                      | 1.12                                                               | 1.07                                                               | 1.01                                                                | 1.06                                                                 |
| Final $R$ indices [ $I > 2\sigma(I)$ ]                                        | $R_1 = 0.0180$<br>$wR_2 = 0.0438$                                  | $R_1 = 0.0226$<br>$wR_2 = 0.0557$                                  | $R_1 = 0.0354$<br>$wR_2 = 0.0577$                                   | $R_1 = 0.0207$<br>$wR_2 = 0.0505$                                    |
| $R$ indices (all data)                                                        | $R_1 = 0.0196$<br>$wR_2 = 0.0443$                                  | $R_1 = 0.0233$<br>$wR_2 = 0.0561$                                  | $R_1 = 0.0623$<br>$wR_2 = 0.0670$                                   | $R_1 = 0.0232$<br>$wR_2 = 0.0515$                                    |
| $\Delta\rho_{\text{max}}/\Delta\rho_{\text{min}} / \text{e } \text{\AA}^{-3}$ | 1.15/−0.35                                                         | 1.75/−1.26                                                         | 1.33/−1.34                                                          | 1.13/−0.86                                                           |
| CCDC number                                                                   | 2023495                                                            | 2023493                                                            | 2023492                                                             | 2023494                                                              |

**Table S8.** Geometric parameters of anionic units of **2A4Mprm** crystals.

|                                                               |              |                           |              |                                       |              |
|---------------------------------------------------------------|--------------|---------------------------|--------------|---------------------------------------|--------------|
| <b>(2A4Mprm)<sub>2</sub>SbCl<sub>5</sub> · H<sub>2</sub>O</b> |              |                           |              |                                       |              |
| Sb—Cl1 <sup>1</sup>                                           | 2.5910(7) Å  | Cl1—Sb—Cl1 <sup>1</sup>   | 171.939(12)° | Cl2—Sb—Cl14                           | 175.840(11)° |
| Sb—Cl1                                                        | 2.5910(7) Å  | Cl1 <sup>1</sup> —Sb—Cl14 | 92.847(6)°   | Cl3—Sb—Cl1                            | 87.138(6)°   |
| Sb—Cl14                                                       | 3.0157(14) Å | Cl1—Sb—Cl14               | 92.847(6)°   | Cl3—Sb—Cl1 <sup>1</sup>               | 87.138(6)°   |
| Sb—Cl2                                                        | 2.4472(11) Å | Cl2—Sb—Cl1 <sup>1</sup>   | 87.368(6)°   | Cl3—Sb—Cl14                           | 90.24(2)°    |
| Sb—Cl3                                                        | 2.3971(13) Å | Cl2—Sb—Cl1                | 87.367(6)°   | Cl3—Sb—Cl2                            | 93.92(2)°    |
| Symmetry code: 1: x, −y+1/2, z                                |              |                           |              |                                       |              |
| <b>(2A4Mprm)<sub>2</sub>BiCl<sub>5</sub> · H<sub>2</sub>O</b> |              |                           |              |                                       |              |
| Bi—Cl1 <sup>1</sup>                                           | 2.6602(12) Å | Cl2—Bi—Cl1 <sup>1</sup>   | 87.773(16)°  | Cl1 <sup>1</sup> —Bi—Cl3 <sup>2</sup> | 91.452(16)°  |
| Bi—Cl1                                                        | 2.6601(12) Å | Cl2—Bi—Cl3                | 94.96(4)°    | Cl3—Bi—Cl14                           | 92.09(4)°    |
| Bi—Cl14                                                       | 2.8840(17) Å | Cl2—Bi—Cl3 <sup>2</sup>   | 84.38(4)°    | Cl3—Bi—Cl1 <sup>1</sup>               | 88.520(16)°  |
| Bi—Cl2                                                        | 2.5732(15) Å | Cl4—Bi—Cl3 <sup>2</sup>   | 88.56(4)°    | Cl3—Bi—Cl1                            | 88.520(16)°  |
| Bi—Cl3                                                        | 2.6322(19) Å | Cl1 <sup>1</sup> —Bi—Cl14 | 92.416(17)°  | Cl3—Bi—Cl3 <sup>2</sup>               | 179.34(5)°   |
| Bi—Cl3 <sup>2</sup>                                           | 2.954(2) Å   | Cl1—Bi—Cl14               | 92.417(17)°  | Bi—Cl3—Bi <sup>3</sup>                | 179.34(5)°   |
| Cl2—Bi—Cl14                                                   | 172.95(3)°   | Cl1 <sup>1</sup> —Bi—Cl1  | 174.42(3)°   |                                       |              |
| Cl2—Bi—Cl1                                                    | 87.773(16)°  | Cl1—Bi—Cl3 <sup>2</sup>   | 91.453(16)°  |                                       |              |
| Symmetry codes: 1: x, −y+1/2, z; 2: x+1, y, z; 3: x−1, y, z   |              |                           |              |                                       |              |
| <b>(2A4Mprm)<sub>2</sub>SbBr<sub>5</sub> · H<sub>2</sub>O</b> |              |                           |              |                                       |              |
| Sb—Br2                                                        | 2.8115(9) Å  | Br2—Sb—Br5                | 89.67(2)°    | Br3—Sb—Br5                            | 177.421(16)° |
| Sb—Br4                                                        | 2.7471(8) Å  | Br4—Sb—Br2                | 179.820(19)° | Br5—Sb—Br2 <sup>1</sup>               | 83.58(2)°    |
| Sb—Br2 <sup>1</sup>                                           | 3.0799(9) Å  | Br4—Sb—Br2 <sup>1</sup>   | 89.07(3)°    | Br1—Sb—Br2 <sup>1</sup>               | 174.377(16)° |
| Sb—Br3                                                        | 2.7229(8) Å  | Br4—Sb—Br5                | 90.20(2)°    | Br1—Sb—Br2                            | 90.00(3)°    |
| Sb—Br5                                                        | 2.8317(9) Å  | Br3—Sb—Br2 <sup>1</sup>   | 93.91(2)°    | Br1—Sb—Br4                            | 90.13(3)°    |
| Sb—Br1                                                        | 2.5829(8) Å  | Br3—Sb—Br2                | 89.78(2)°    | Br1—Sb—Br3                            | 91.66(2)°    |
| Br2—Sb—Br2 <sup>1</sup>                                       | 90.79(3)°    | Br3—Sb—Br4                | 90.34(2)°    | Br1—Sb—Br5                            | 90.86(2)°    |
| Symmetry code: 1: −x, y+1/2, −z+1/2                           |              |                           |              |                                       |              |
| <b>(2A4Mprm)<sub>4</sub>Bi<sub>2</sub>Br<sub>10</sub></b>     |              |                           |              |                                       |              |
| Bi1—Br5                                                       | 2.8676(12) Å | Br4—Bi1—Br5               | 90.14(2)°    | Br1—Bi1—Br4                           | 96.88(3)°    |
| Bi1—Br4                                                       | 2.8182(12) Å | Br4—Bi1—Br2               | 172.732(12)° | Br1—Bi1—Br3                           | 90.50(3)°    |
| Bi1—Br3                                                       | 2.7878(12) Å | Br4—Bi1—Br2 <sup>1</sup>  | 89.10(3)°    | Br1—Bi1—Br2 <sup>1</sup>              | 171.870(12)° |
| Bi1—Br1                                                       | 2.6651(13) Å | Br3—Bi1—Br5               | 178.580(12)° | Br1—Bi1—Br2                           | 90.37(3)°    |
| Bi1—Br2 <sup>1</sup>                                          | 3.1432(15) Å | Br3—Bi1—Br4               | 89.19(2)°    | Br2—Bi1—Br2 <sup>1</sup>              | 83.64(3)°    |

|                                |              |                          |           |                          |           |
|--------------------------------|--------------|--------------------------|-----------|--------------------------|-----------|
| Bi1—Br2                        | 3.0155(14) Å | Br3—Bi1—Br2              | 90.29(2)° | Bi1—Br2—Bi1 <sup>1</sup> | 96.36(3)° |
| Br5—Bi1—Br2 <sup>1</sup>       | 97.18(3)°    | Br3—Bi1—Br2 <sup>1</sup> | 84.06(3)° |                          |           |
| Br5—Bi1—Br2                    | 90.53(2)°    | Br1—Bi1—Br5              | 88.34(3)° |                          |           |
| Symmetry code: 1: -x, -y, -z+1 |              |                          |           |                          |           |

**Table S9.** Hydrogen bonds parameters (Å, °) of **2A4Mprm** crystals.

| <i>D</i> —H··· <i>A</i>                                                                      | <i>D</i> —H [Å] | <i>H</i> ··· <i>A</i> [Å] | <i>D</i> ··· <i>A</i> [Å] | <i>D</i> —H··· <i>A</i> [°] |
|----------------------------------------------------------------------------------------------|-----------------|---------------------------|---------------------------|-----------------------------|
| <b>(2A4Mprm)<sub>2</sub>SbCl<sub>5</sub> · H<sub>2</sub>O</b>                                |                 |                           |                           |                             |
| N1—H1···O1W                                                                                  | 0.88            | 2.01                      | 2.8736(12)                | 165                         |
| N2—H2A···N3 <sup>1</sup>                                                                     | 0.88            | 2.14                      | 3.0197(15)                | 178                         |
| N2—H2B···Cl4                                                                                 | 0.88            | 2.42                      | 3.2750(11)                | 165                         |
| O1W—H1WA···Cl4                                                                               | 0.870(15)       | 2.289(15)                 | 3.0971(17)                | 154.6(19)                   |
| O1W—H1WB···Cl4 <sup>2</sup>                                                                  | 0.861(15)       | 2.408(15)                 | 3.2644(19)                | 172.8(19)                   |
| Symmetry codes: 1: -x+1, -y+1, -z; 2: x-1, y, z                                              |                 |                           |                           |                             |
| <b>(2A4Mprm)<sub>2</sub>BiCl<sub>5</sub> · H<sub>2</sub>O</b>                                |                 |                           |                           |                             |
| N1—H1···O1W                                                                                  | 0.88            | 2.02                      | 2.882(3)                  | 165                         |
| N2—H2A···N3 <sup>1</sup>                                                                     | 0.88            | 2.13                      | 3.008(4)                  | 179                         |
| N2—H2B···Cl4                                                                                 | 0.88            | 2.48                      | 3.333(3)                  | 163                         |
| O1W—H1WB···Cl4                                                                               | 0.867(19)       | 2.31(2)                   | 3.125(4)                  | 157(4)                      |
| O1W—H1WA···Cl4 <sup>2</sup>                                                                  | 0.870(19)       | 2.40(2)                   | 3.263(4)                  | 171(4)                      |
| Symmetry codes: 1: -x+1, -y+1, -z; 2: x-1, y, z                                              |                 |                           |                           |                             |
| <b>(2A4Mprm)<sub>2</sub>SbBr<sub>5</sub> · H<sub>2</sub>O</b>                                |                 |                           |                           |                             |
| N3—H3···Br5                                                                                  | 0.88            | 2.44                      | 3.321(4)                  | 175                         |
| N2—H2A···Br4 <sup>1</sup>                                                                    | 0.88            | 2.51                      | 3.348(4)                  | 160                         |
| N2—H2B···Br2                                                                                 | 0.88            | 2.68                      | 3.384(4)                  | 138                         |
| N1—H1···O1W                                                                                  | 0.86            | 1.89                      | 2.739(5)                  | 167                         |
| O1W—H1WA···Br3 <sup>2</sup>                                                                  | 0.900(18)       | 2.66(3)                   | 3.412(3)                  | 142(4)                      |
| Symmetry codes: 1: -x, y-1/2, -z+1/2; 2: x+1, -y+3/2, z+1/2                                  |                 |                           |                           |                             |
| <b>(2A4Mprm)<sub>4</sub>Bi<sub>2</sub>Br<sub>10</sub></b>                                    |                 |                           |                           |                             |
| N2A—H2AA···N3A <sup>3</sup>                                                                  | 0.88            | 2.12                      | 2.997(5)                  | 173                         |
| N2B—H2BAA···N1B <sup>1</sup>                                                                 | 0.88            | 2.16                      | 3.036(5)                  | 173                         |
| N1—H1···Br2 <sup>4</sup>                                                                     | 0.88            | 2.91                      | 3.669(4)                  | 146                         |
| N3B—H3B···Br4                                                                                | 0.88            | 2.48                      | 3.315(3)                  | 159                         |
| N2B—H2BB···Br4 <sup>2</sup>                                                                  | 0.88            | 2.75                      | 3.409(4)                  | 133                         |
| N2A—H2AB···Br2 <sup>4</sup>                                                                  | 0.88            | 2.50                      | 3.354(4)                  | 165                         |
| Symmetry codes: 1: -x+1, -y+1, -z+1; 2: -x+1, -y, -z+1; 3: -x, -y+1, -z+2; 4: -x, -y+1, -z+1 |                 |                           |                           |                             |

### 3. Dielectric spectroscopy

#### a) $(2\text{Sprm})_2\text{BiCl}_5$

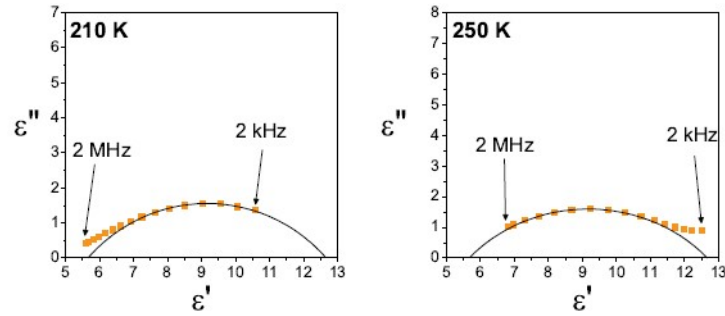

Figure S4. Cole-Cole plots of  $\epsilon''$  vs  $\epsilon'$  at selected temperatures obtained for  $(2\text{Sprm})_2\text{BiCl}_5$  crystal.

Table S10. Values of the parameters of Cole-Cole relation at selected temperatures for  $(2\text{Sprm})_2\text{BiCl}_5$  crystal.

| T [K] | $\epsilon_0$ | $\epsilon_\infty$ | $\alpha$ | $\tau$ [s]           |
|-------|--------------|-------------------|----------|----------------------|
| 270   | 12.50        | 5.56              | 0.40     | $1.52 \cdot 10^{-7}$ |
| 260   | 12.70        | 5.69              | 0.43     | $4.40 \cdot 10^{-7}$ |
| 250   | 12.67        | 5.67              | 0.46     | $1.01 \cdot 10^{-7}$ |
| 235   | 12.67        | 5.66              | 0.47     | $3.19 \cdot 10^{-6}$ |
| 220   | 12.67        | 5.66              | 0.48     | $8.77 \cdot 10^{-6}$ |
| 205   | 12.67        | 5.67              | 0.47     | $3.16 \cdot 10^{-5}$ |

#### b) $(2\text{Aprm})_2\text{SbCl}_5$

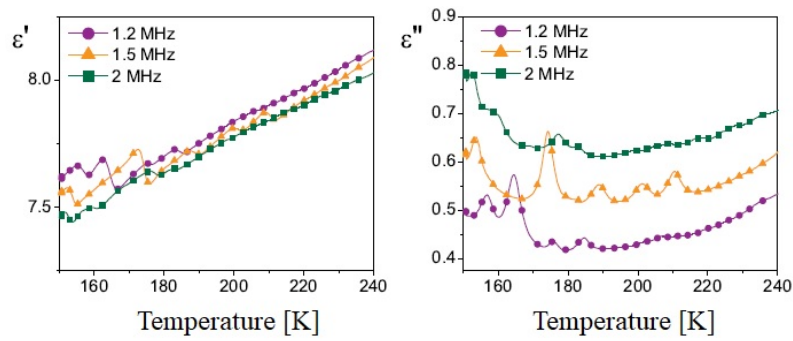

Figure S5. Temperature-dependent real and imaginary parts of electric permittivity obtained along [101] direction on cooling  $(2\text{Aprm})_2\text{SbCl}_5$  crystal.

c)  $(2\text{Aprm})_4\text{Bi}_2\text{Cl}_{10} \cdot 2\text{H}_2\text{O}$

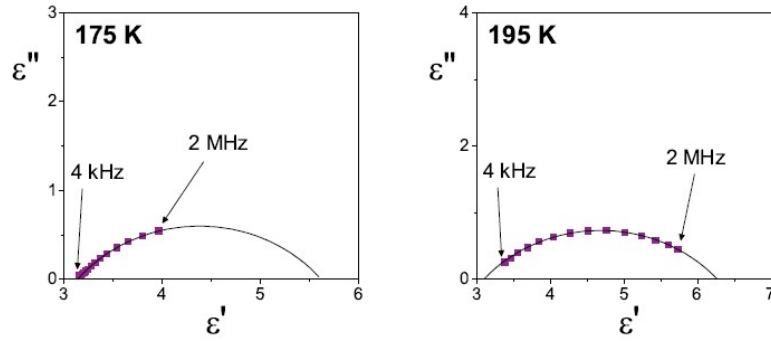

Figure S6. Cole-Cole plots of  $\epsilon''$  vs  $\epsilon'$  at selected temperatures obtained for  $(2\text{Aprm})_4\text{Bi}_2\text{Cl}_{10} \cdot 2\text{H}_2\text{O}$  crystal.

Table S11. Values of the parameters of Cole-Cole relation at selected temperatures for  $(2\text{Aprm})_4\text{Bi}_2\text{Cl}_{10} \cdot 2\text{H}_2\text{O}$  crystal.

| T [K] | $\epsilon_0$ | $\epsilon_\infty$ | $\alpha$ | $\tau$ [s]           |
|-------|--------------|-------------------|----------|----------------------|
| 195   | 6.27         | 3.10              | 0.45     | $3.05 \cdot 10^{-6}$ |
| 190   | 6.16         | 3.11              | 0.45     | $7.51 \cdot 10^{-6}$ |
| 185   | 6.01         | 3.14              | 0.43     | $1.70 \cdot 10^{-5}$ |
| 180   | 5.89         | 3.14              | 0.43     | $3.72 \cdot 10^{-5}$ |
| 175   | 5.62         | 3.14              | 0.43     | $9.84 \cdot 10^{-5}$ |
| 170   | 5.22         | 3.14              | 0.42     | $2.88 \cdot 10^{-4}$ |

d)  $(2\text{A4Mprm})_4\text{Bi}_2\text{Br}_{10}$

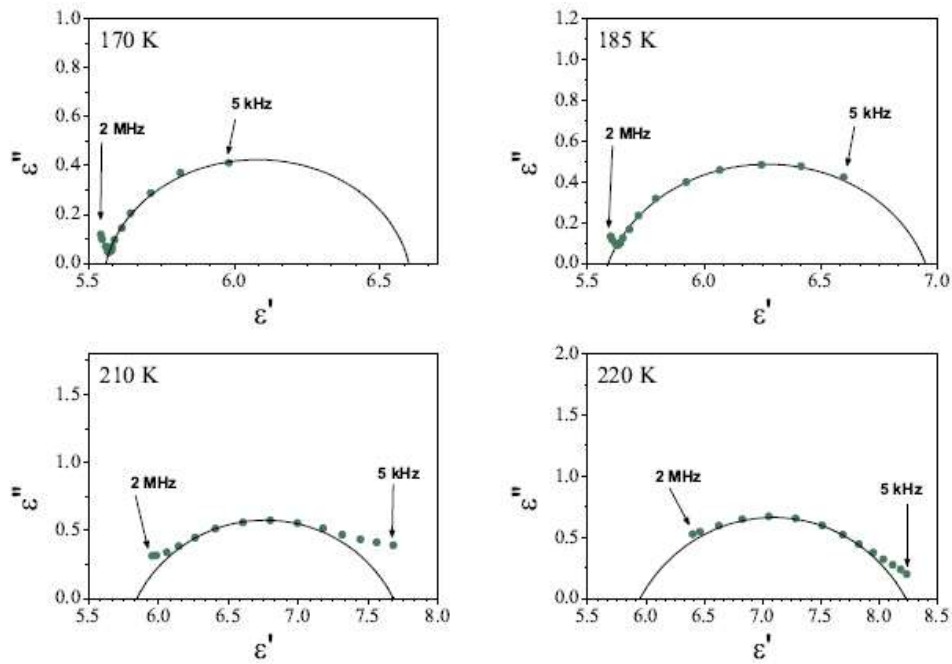

Figure S7. Cole-Cole plots of  $\epsilon''$  vs  $\epsilon'$  at selected temperatures obtained for  $(2\text{A4Mprm})_4\text{Bi}_2\text{Br}_{10}$  crystal.

**Table S12.** Values of the parameters of Cole-Cole relation at selected temperatures for **(2A4Mprm)<sub>4</sub>Bi<sub>2</sub>Br<sub>10</sub>** crystal.

| T [K] | $\epsilon_0$ | $\epsilon_\infty$ | $\alpha$ | $\tau$ [s]           |
|-------|--------------|-------------------|----------|----------------------|
| 170   | 6.60         | 5.56              | 0.13     | $3.85 \cdot 10^{-5}$ |
| 180   | 6.87         | 5.59              | 0.19     | $1.88 \cdot 10^{-5}$ |
| 190   | 7.10         | 5.60              | 0.25     | $8.62 \cdot 10^{-6}$ |
| 200   | 7.30         | 5.68              | 0.28     | $3.62 \cdot 10^{-6}$ |
| 210   | 7.75         | 5.82              | 0.32     | $1.61 \cdot 10^{-6}$ |
| 220   | 8.23         | 5.95              | 0.33     | $6.46 \cdot 10^{-7}$ |

#### 4. References

1. O. V. Dolomanov, L. J. Bourhis, R. J. Gildea, J. A. K. Howard and H. Puschmann, OLEX2: a complete structure solution, refinement and analysis program, *Journal of Applied Crystallography*, 2009, **42**, 339-341.
2. G. Sheldrick, Crystal structure refinement with SHELXL, *Acta Crystallographica Section C*, 2015, **71**, 3-8.
